# Supplementary material
Source: publisher site journal article supplement (https://www.oncotarget.com/article/28288)
Supplement: Supplementary file 1 [file 28288]

## Addendum

**Addendum: BCMab1-Ra, a novel immunotoxin that BCMab1 antibody coupled to Ricin A chain, can eliminate bladder tumor****Chong Li<sup>1,5,\*</sup>, Ruping Yan<sup>2,\*</sup>, Zhao Yang<sup>3,\*</sup>, Haifeng Wang<sup>2</sup>, Ruiyun Zhang<sup>4</sup>, Haige Chen<sup>4</sup> and Jiansong Wang<sup>2</sup>**<sup>1</sup>Core Facility for Protein Research, Institute of Biophysics, Chinese Academy of Sciences, Beijing 100101, China<sup>2</sup>Department of Urology, The Second Affiliated Hospital of Kunming Medical University, Kunming 650101, China<sup>3</sup>CAS Key Laboratory of Pathogenic Microbiology and Immunology, Institute of Microbiology, Chinese Academy of Sciences, Beijing 100101, China<sup>4</sup>Department of Urology, Renji Hospital Affiliated to Shanghai Jiaotong University, School of Medicine, Shanghai 200127, China<sup>5</sup>Beijing Jianlan Institute of Medicine, Beijing 100190, China

\*These authors contributed equally to this work

**Published:****Copyright:** © 2022 Li et al. This is an open access article distributed under the terms of the [Creative Commons Attribution License](#) (CC BY 3.0), which permits unrestricted use, distribution, and reproduction in any medium, provided the original author and source are credited.**Consent was added to this article:** The preliminary clinical study was started under the agreements of the patient and the institutional review board of the hospital, and informed consent was obtained and documented in writing from the patient.Original article: Oncotarget. 2017; 8:46704–46705. <https://doi.org/10.18632/oncotarget.13504>
